# Supplementary material for: Waning of IgG, Total and Neutralizing Antibodies 6 Months Post-Vaccination with BNT162b2 in Healthcare Workers
Source: MDPI journal article supplement (doi:10.3390/vaccines9101092), 2021-09-28
Supplement: s1 [file s1]

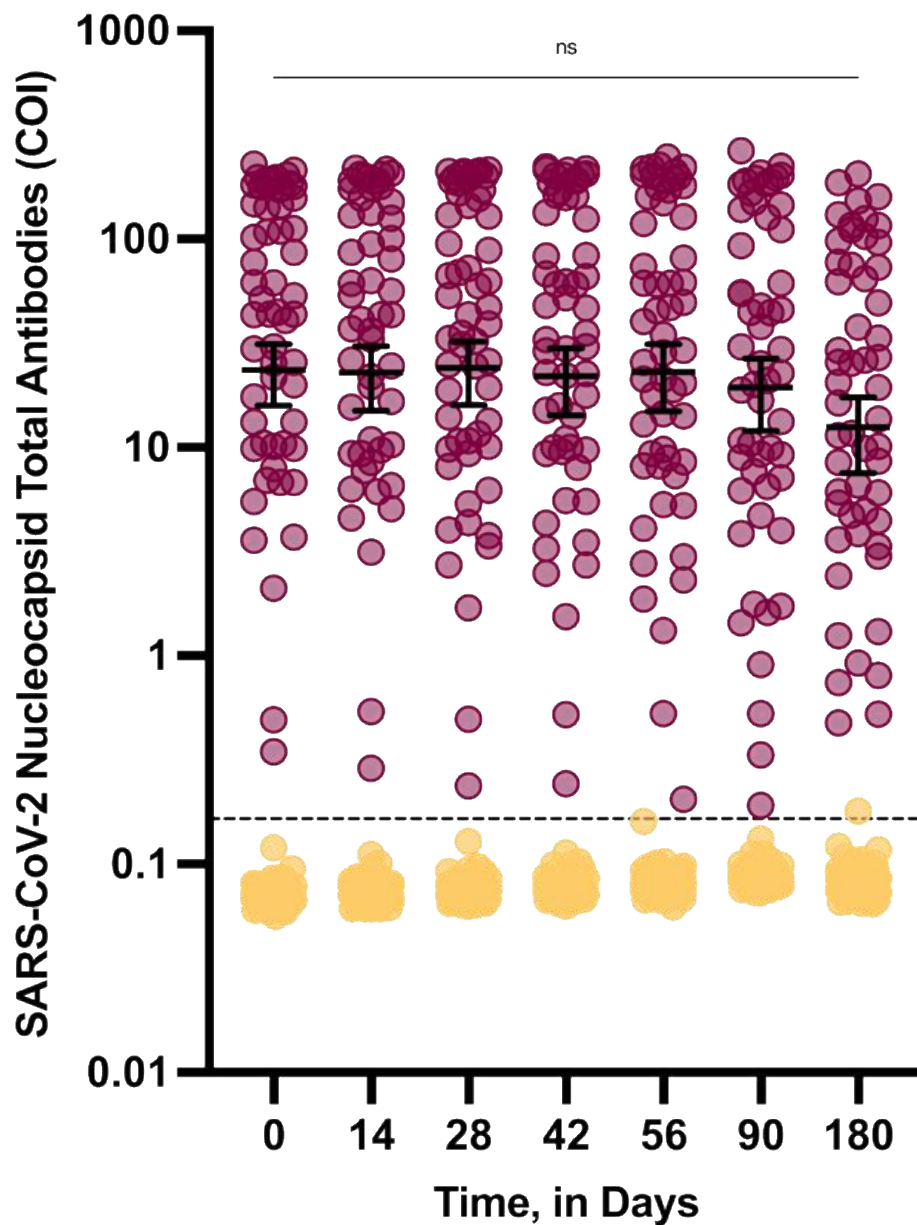

**Figure S1.** Evolution of SARS-CoV-2 nucleocapsid antibodies (COI) in seronegative (yellow) and seropositive individuals (maroon) according to the time since the first vaccine dose administration. Means with 95% confidence intervals ( $\log_{10}$ ) are shown. The black dotted line corresponds to the positivity cut-off (i.e. 0.165 COI). ns = non significant differences between timepoints ( $P < 0.05$ ). Subjects that developed anti-NCP during the study were excluded from the analysis.

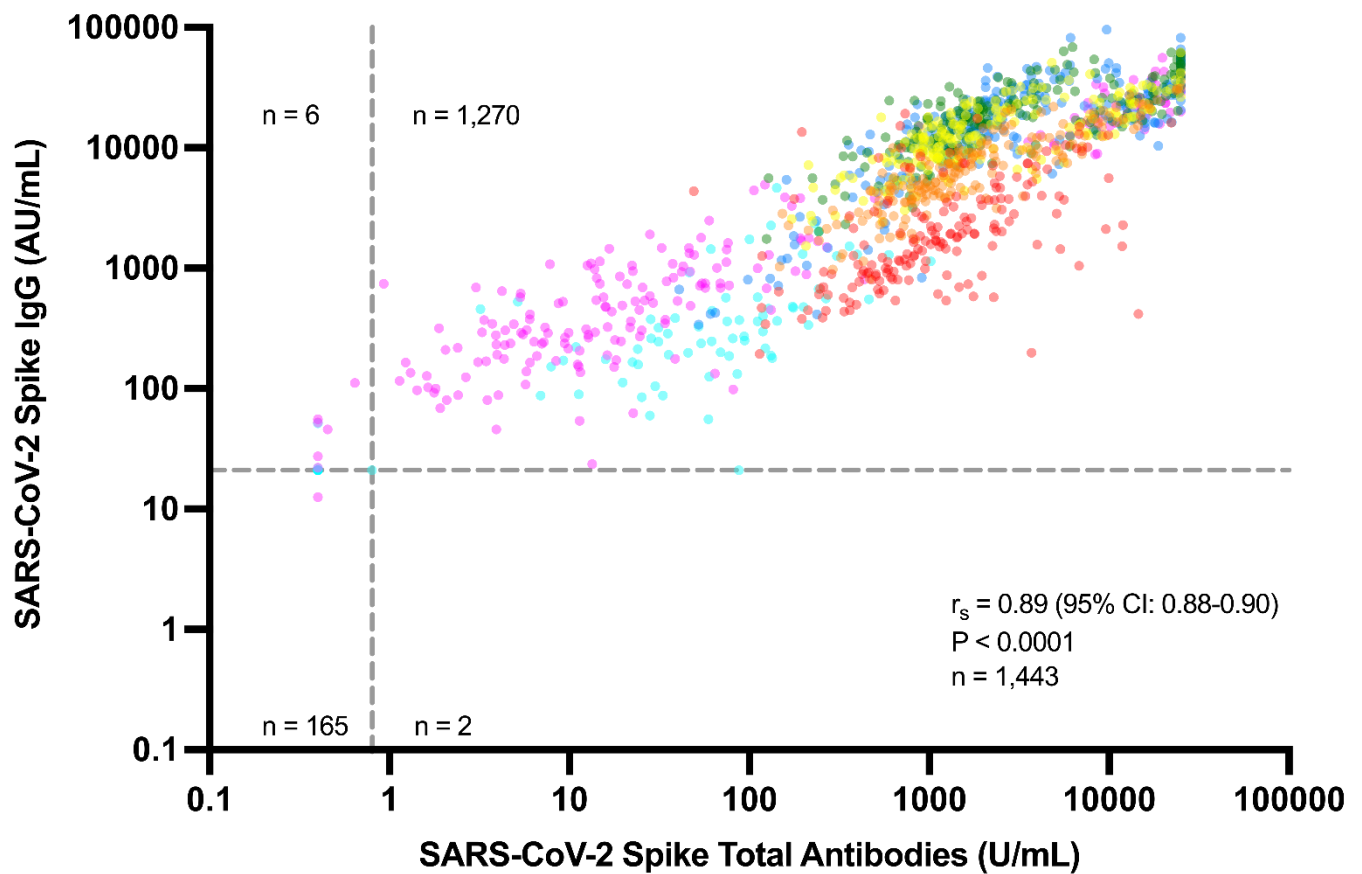

**Figure S2. Correlation of IgG and total anti-spike antibody levels.** Spearman's rho ( $r$ ), 95% confidence interval (95% CI), and p-value are reported in the figure. Manufacturer's cut-off for both assays are represented with dotted lines. Different colors were used to discriminate the different timepoints. (165 points were negative with the two methods and are plotted as 0.8;21).

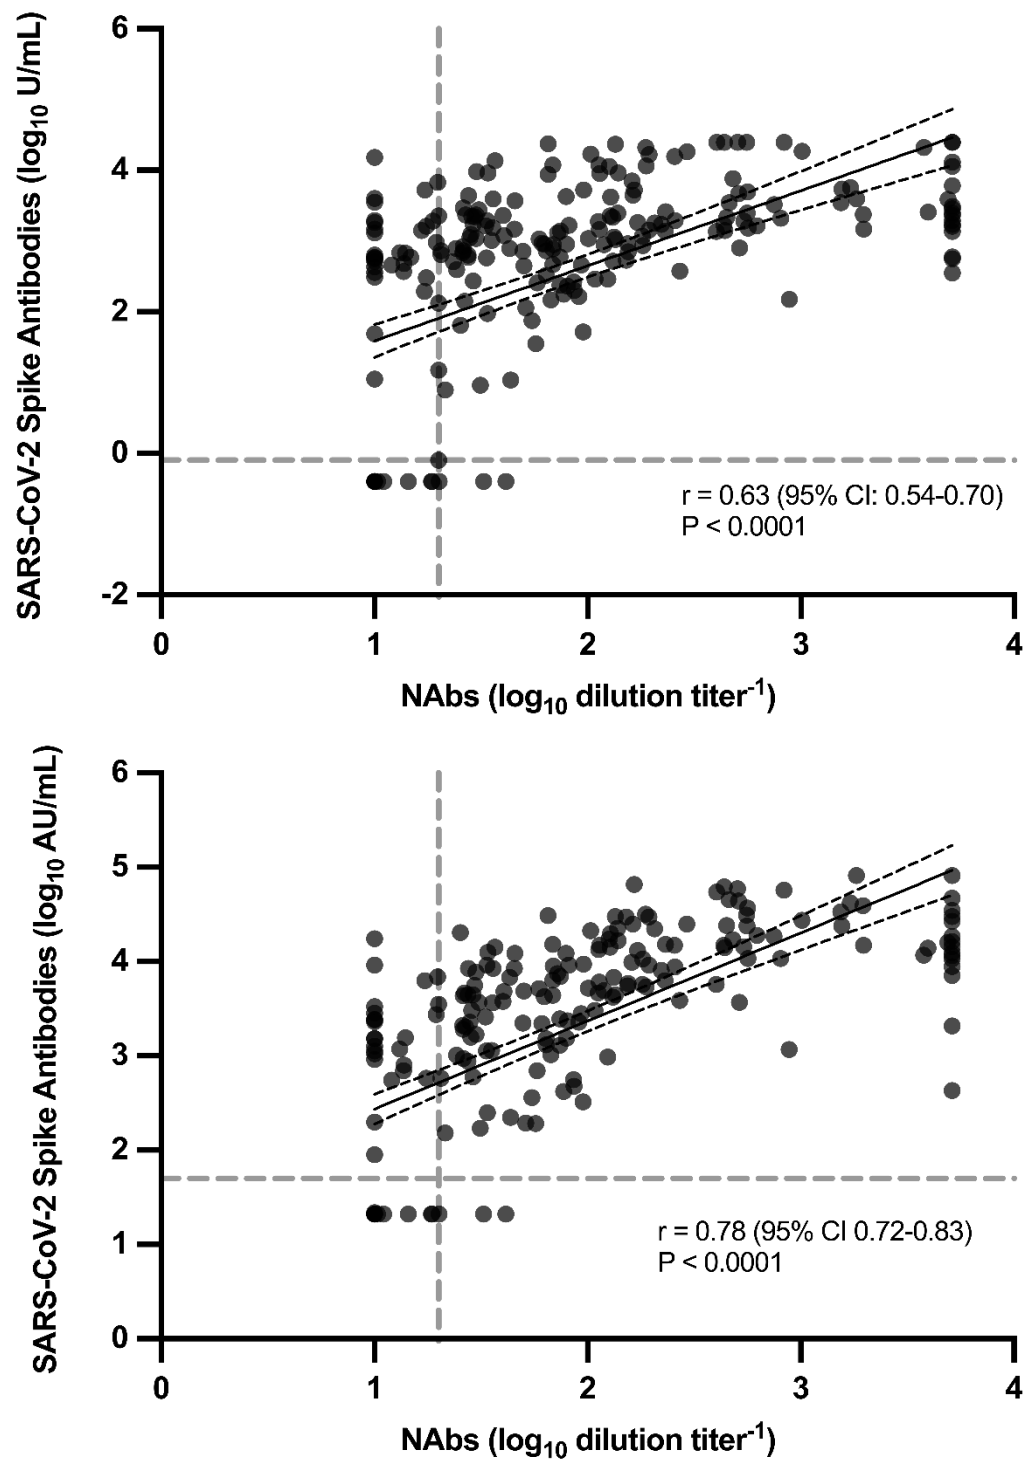

**Figure S3. Correlation of NAb, total and IgG antibodies levels against the spike protein.** Spearman's rho ( $r$ ), 95% confidence interval (95% CI), and p-value are provided in the figure. Manufacturer's cut-off of 0.8 U/mL for total antibodies, 50 AU/mL for IgG antibodies and positivity cut-off of 1/20 for pVNT are represented with grey dotted lines.

**Table S1. Demographic data.** † Body mass index (BMI) data were available only in 220 subjects.

| <b>Demographic Characteristics of the Participants (n = 231)</b> |                    |
|------------------------------------------------------------------|--------------------|
| <b>Sex – no. (%)</b>                                             |                    |
| Female                                                           | 169 (73)           |
| Male                                                             | 62 (27)            |
| <b>Age group – no. (%)</b>                                       |                    |
| ≤ 45 years of age                                                | 139 (60)           |
| > 45 years of age                                                | 92 (40)            |
| <b>Past-COVID history – no. (%)</b>                              | <b>73 (32)</b>     |
| Female                                                           | 52 (71)            |
| Male                                                             | 21 (29)            |
| <b>BMI in kg/m<sup>2</sup> (median, range)†</b>                  | 23.7 (15.3 – 48.2) |
| <b>ABO blood group – no. (%)</b>                                 |                    |
| A                                                                | 76 (33)            |
| B                                                                | 9 (4)              |
| AB                                                               | 18 (8)             |
| O                                                                | 98 (42)            |
| Unknown                                                          | 30 (13)            |
| <b>Rhesus blood group system – no. (%)</b>                       |                    |
| Negative                                                         | 36 (16)            |
| Positive                                                         | 159 (69)           |
| Unknown                                                          | 36 (16)            |
| <b>For female gender – no. (%) :</b>                             |                    |
| <b>Childbearing age</b>                                          | <b>121 (72)</b>    |
| Hormonal contraception                                           | 78 (65)            |
| No hormonal contraception                                        | 38 (31)            |
| Unknown                                                          | 5 (4)              |
| <b>Menopausal</b>                                                | <b>48 (28)</b>     |
| Hormonal replacement therapy                                     | 13 (27)            |
| No hormonal replacement therapy                                  | 30 (63)            |
| Unknown                                                          | 5 (10)             |
